# Supplementary material for: Transformer-Enhanced Generative Adversarial Networks for Improving MR Image Quality in Prostate Imaging
Source: Research Square preprint supplement (doi:10.21203/rs.3.rs-7833508/v1), 2025-11-13
Supplement: Supplementary file 1 [file adfbaf29a6463b0e2f80aa5e.docx]

| **Table E1.** Quantitative evaluation of paired intermediate quality T2WI in ablation study | | | | | | | | |
| --- | --- | --- | --- | --- | --- | --- | --- | --- |
| Model | CycleGAN | SPADE | Pyramid | Transformer | PSNR | SSIM | LPIPS | FCS |
| CycleGAN | ✓ |  |  |  | 28.6 ± 0.2 | 0.316 ± 0.040 | 0.329 ± 0.034 | 0.871 ± 0.029 |
| S-CyGAN | ✓ | ✓ |  |  | 28.9 ± 0.4 | 0.410 ± 0.047 | 0.246 ± 0.030 | 0.890 ± 0.028 |
| PS-CyGAN | ✓ | ✓ | ✓ |  | 29.1 ± 0.4 | 0.500 ± 0.054 | 0.213 ± 0.029 | 0.896 ± 0.030 |
| PST-CyGAN | ✓ | ✓ | ✓ | ✓ | 29.3 ± 0.5* | 0.558 ± 0.116* | 0.169 ± 0.056# | 0.915 ± 0.028* |
| Note. * Higher is better; # Lower is better. | | | | | | | | |

| **Table E2.**  **Imaging parameters of T2WI for prostate MRI in multicenter datasets** | | | | | | |
| --- | --- | --- | --- | --- | --- | --- |
| Center | T2WI | Vendor | Field strength | Voxel size (mm) | TE (s) | TR (s) |
| Center 1 | Axial TSE* | Siemens Prisma | 3T | 0.35-0.38 × 0.35-0.38 × 2.0 | 110 | 3500 |
| Center 1 | Axial  TSE | Siemens Verio, Skyra, Vida, and Prisma; Philips Ingenia; United imaging u770 | 3T | 0.5-0.8 × 0.5-0.8 × 3.0-4.0 | 105-110 | 3500-7000 |
| Center 2 | Axial TSE | Siemens Skyra | 3T | 0.6-0.8 × 0.6-0.8 × 3.0-4.5 | 60/104 | 6540/7590 |
| Center 3 | Axial TSE | Philips Ingenia | 3T | 0.6-0.9 × 0.6-0.9 × 3.0-4.5 | 77/78/100 | 4542/4828/4898/  4733/4972/ 6000 |
| Center 7 | Axial TSE | Siemens Skyra | 3T | 0.78 × 0.78 × 3.0-3.5 | 72/97 | 3900/4342/6118/  6173/6489/6498/  7500 |
| Center 5 | Axial TSE | Siemens Skyra, Verio | 3T | 0.59 × 0.59 × 3.0 | 62/64/74/97/104 | 4480/5000/5100/  7500/8600 |
| Center 4 | Axial  TSE | Philips Achieva TX | 3T | 0.86 × 0.86 × 3.0 | 76/80 | 2750/3000 |
| Center 6 | Axial TSE | Philips Achieva | 3T | 0.77 × 0.77 × 4.0 | 91 | 3000 |
| PI-CAI | Axial TSE | N/A | 3T | 0.58 × 0.58 × 3.5 | N/A | N/A |
| Abbreviation: *T2WI*, T2-weighted imaging; *DWI*, diffusion-weighted imaging; *ADC*, Apparent diffusion coefficient; *SUH* 1*st*; *SUH* 2*nd*; *SKH*; *TZH*; *CSH*. TR = repetition time; TE = echo time.  *, using a novel deep-accelerated TSE sequence for achieving high-resolution, high-SNR T2WI as a dataset for training GAN model. | | | | | | |
